# Supplementary material for: Heterogeneous catalysis by ultra-small bimetallic nanoparticles surpassing homogeneous catalysis for carbon–carbon bond forming reactions
Source: Royal Society of Chemistry journal article supplement (doi:10.1039/d0nr04105j), 2020-01-01

## **Electronic Supplementary Information**

### **Heterogeneous Catalysis by Ultra-small Bimetallic Nanoparticles Surpassing Homogeneous Catalysis for Carbon-Carbon Bond Forming Reactions**

Nazgol Norouzi<sup>a</sup>, Mrinmoy K. Das<sup>a</sup>, Alexander J. Richard<sup>a</sup>, Amr A. Ibrahim<sup>b</sup>,  
Hani M. El-Kaderi<sup>\*a</sup>, and M. Samy El-Shall<sup>\*a</sup>

<sup>a</sup>Department of Chemistry, Virginia Commonwealth University,  
Richmond, Virginia 23284-2006, United States

<sup>b</sup>Department of Chemistry, Faculty of Science, Mansoura University,  
Al-Mansoura 35516, Egypt

#### **Corresponding Authors**

\*E-mail: [helkaderi@vcu.edu](mailto:helkaderi@vcu.edu), Fax (804) 828-8599. Tel (804) 828-7505.

\*E-mail: [mselshal@vcu.edu](mailto:mselshal@vcu.edu), Fax (804) 828-8599. Tel (804) 828-2753.

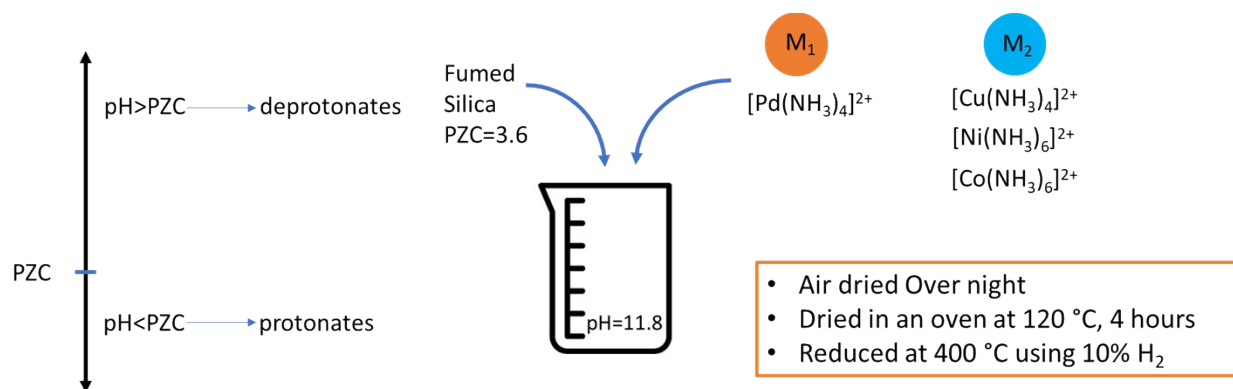

**Figure S1.** Strong electrostatic adsorption scheme.

Surface loading (SL) in  $\text{m}^2 \text{L}^{-1}$ , surface area (SA) in  $\text{m}^2 \text{g}^{-1}$ , mass of the support in g and total volume of the solution in L.

$$SL = \frac{SA \times \text{mass of the support}}{\text{Volume}} \quad (\text{Eq. S1})$$

**Table S1.** Bulk composition of various metal loading for the CuPd catalysts as determined by ICP-OES.

| Catalyst                        | Targeted weight loading (wt%) |     | Adsorbed Metal (%) |    | Actual weight loading (wt%) |      | Catalyst Denomination |
|---------------------------------|-------------------------------|-----|--------------------|----|-----------------------------|------|-----------------------|
|                                 | Cu                            | Pd  | Cu                 | Pd | Cu                          | Pd   |                       |
| <b>CuPd/SiO<sub>2</sub></b>     | 1                             | 1   | 97                 | 97 | 0.97                        | 0.97 | 0.97 Cu 0.97 Pd       |
| <b>2Cu1Pd/SiO<sub>2</sub></b>   | 2                             | 1   | 89                 | 95 | 1.78                        | 0.95 | 1.78 Cu 0.95 Pd       |
| <b>0.5Cu1Pd/SiO<sub>2</sub></b> | 0.5                           | 1   | 98                 | 95 | 0.49                        | 0.95 | 0.49 Cu 0.95 Pd       |
| <b>1Cu0.5Pd/SiO<sub>2</sub></b> | 1                             | 0.5 | 97                 | 99 | 0.97                        | 0.99 | 0.97 Cu 0.97 Pd       |

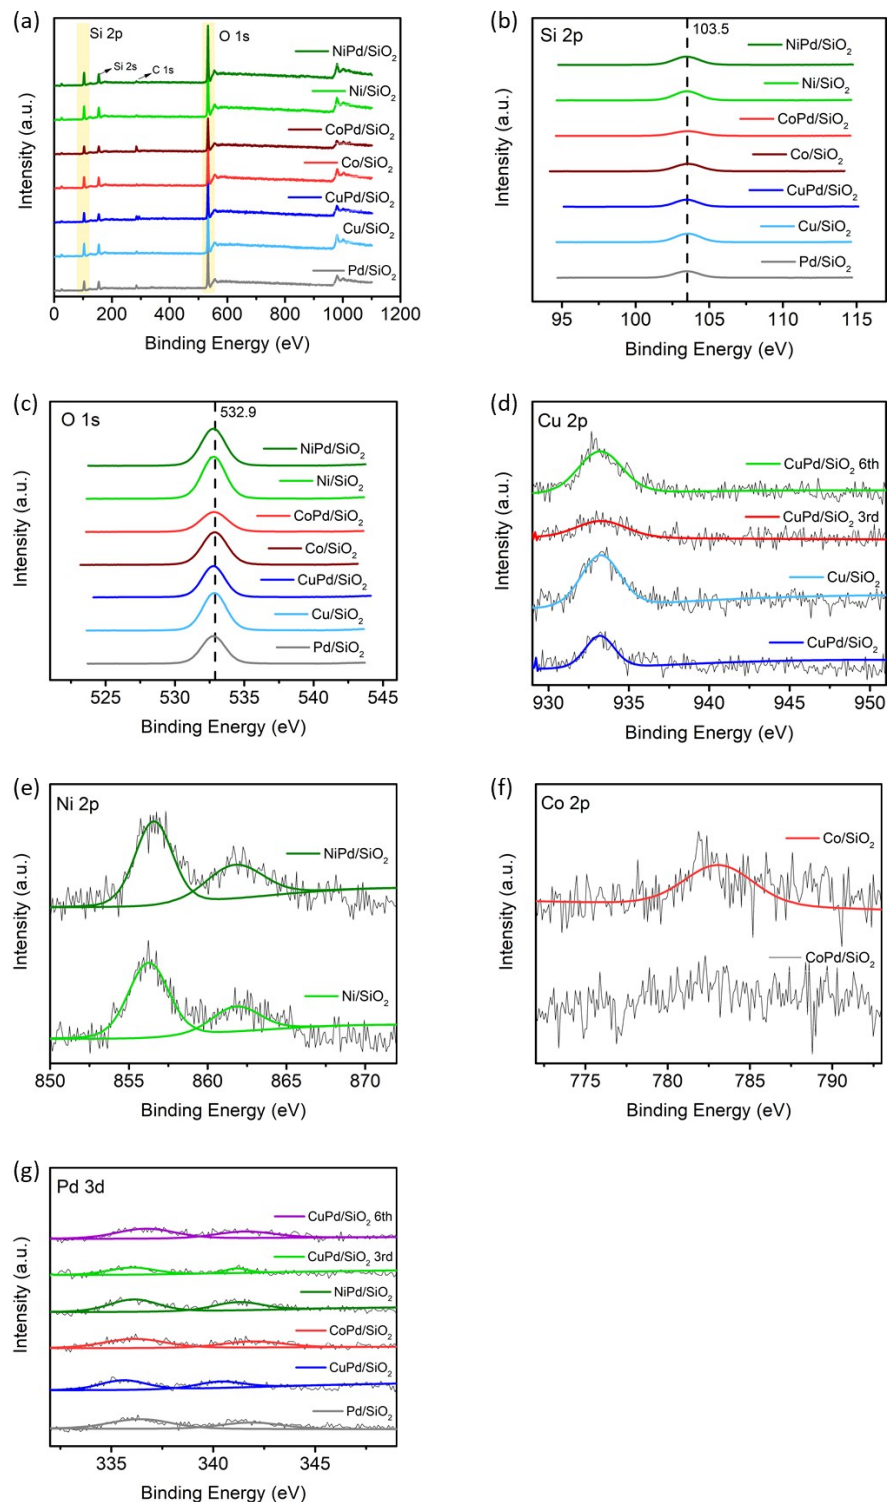

**Figure S2.** XPS analysis of bimetallic and monometallic catalysts (a) Survey spectra (b) Deconvoluted Si 2p spectra, (c) Deconvoluted O 1s spectra, (d) Deconvoluted Cu 2p spectra, (e) Deconvoluted Ni 2p spectra, (f) Deconvoluted Co 2p spectra, (g) Deconvoluted Pd 3d spectra.

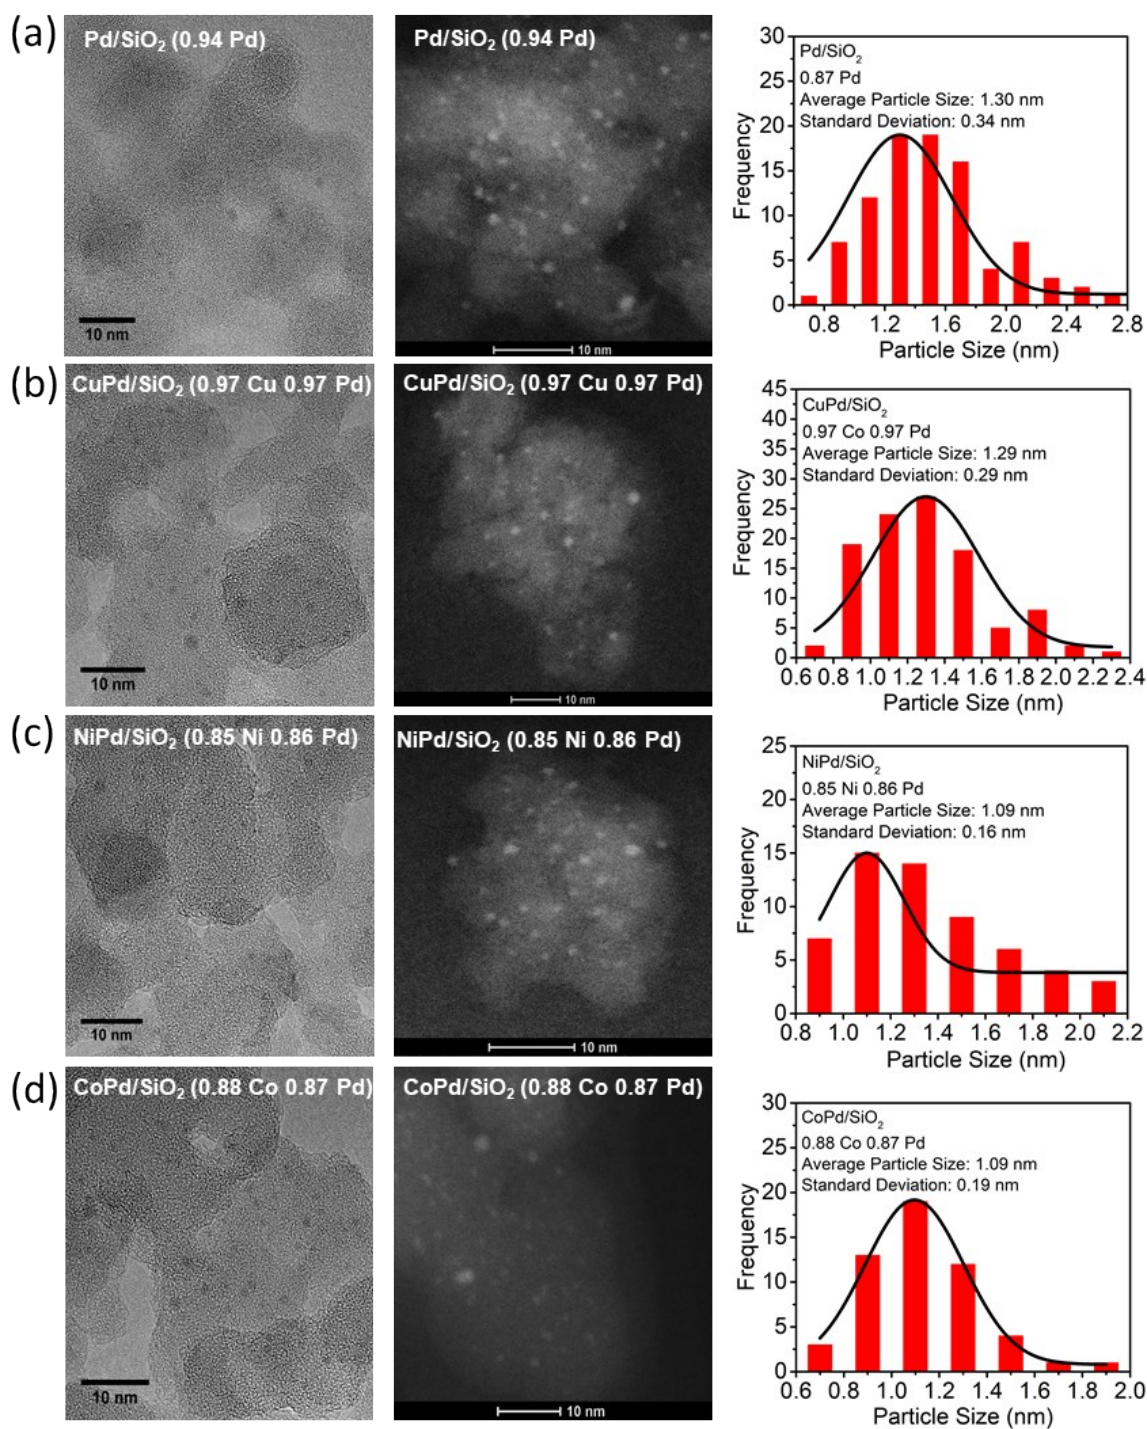

**Figure S3.** HRTEM, STEM, and the corresponding particle size distribution for (a) Pd/SiO<sub>2</sub>, (b) CuPd/SiO<sub>2</sub>, (c) NiPd/SiO<sub>2</sub> and (d) CoPd/SiO<sub>2</sub>.



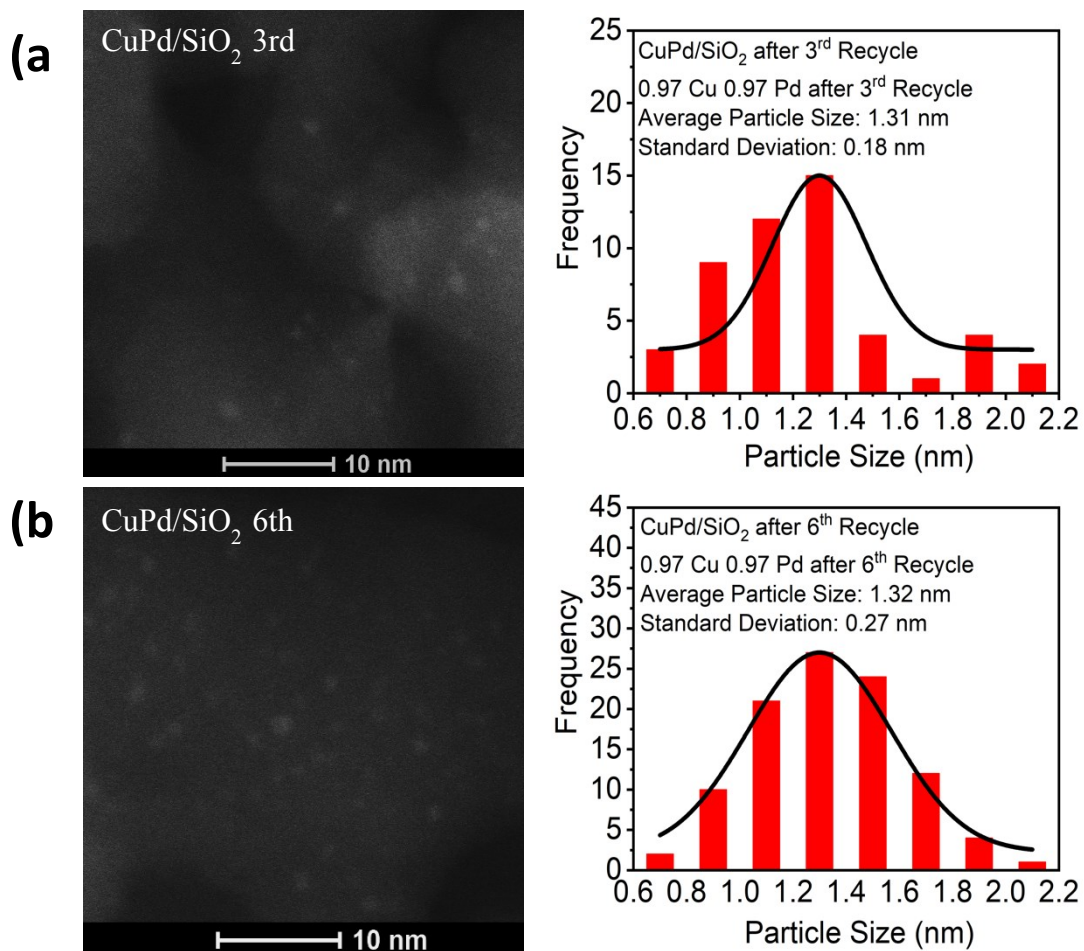

**Figure S4.** STEM and the corresponding particle size distribution for the CuPd/SiO<sub>2</sub> catalyst. (a) after the 3<sup>rd</sup> recycled run and (b) after the 6<sup>th</sup> recycled run.

**Table S2.** Conversions for recyclability of the Pd/SiO<sub>2</sub> catalyst for the microwave assisted Suzuki cross-coupling reaction (5 min) at 60 °C.

| Run | Conversion (%) |
|-----|----------------|
| 1   | 100            |
| 2   | 97             |
| 3   | 93             |
| 4   | 92             |
| 5   | 91             |
| 6   | 89             |

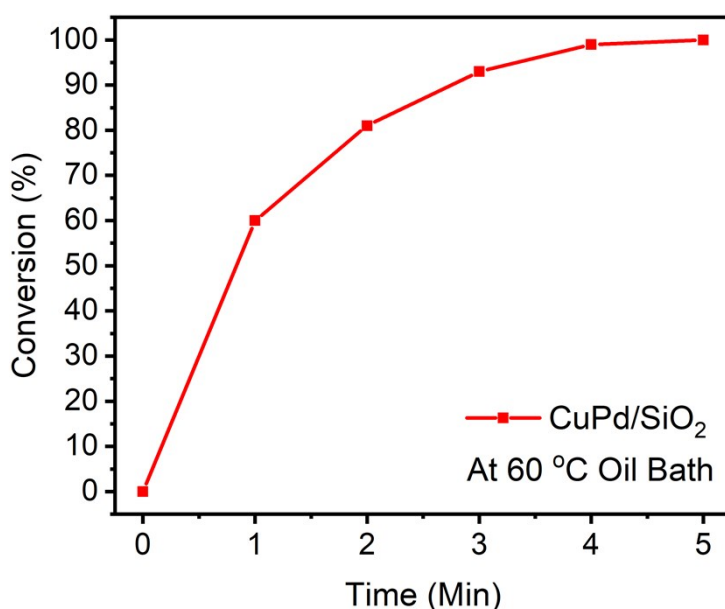

**Figure S5.** Cross-coupling reaction between bromobenzene with benzenboronic acid in an oil bath at 60 °C. The CuPd/SiO<sub>2</sub> catalyst (Pd: 1.05 μmol, 0.3 mol%) was dispersed in a glass vial with 2 ml of ethanol and 2 ml of deionized (DI) water and the vial was then placed in the 60 °C oil bath. After the solution temperature is reaches 60 °C, bromobenzene (50 mg, 0.32 mmol, 1 equiv) was added to the solution along with benzenboronic acid (47 mg, 0.38 mmol, 1.2 equiv) and stirred for 30 seconds to ensure a homogeneous mixture. Finally, potassium carbonate (133 mg, 0.96 mmol, 3 equiv) was added to the solution to start the reaction. During the reaction small aliquots were collected every minute and the biphenyl product was extracted using ethyl acetate and centrifugation and analyzed by GC-FID.



**Table S3.** Surface compositions of the as prepared CuPd/SiO<sub>2</sub> catalyst and the 3<sup>rd</sup> and 6<sup>th</sup> recycled catalysts as determined by XPS.

| Catalyst                              | Silicon (At%) | Oxygen (At%) |
|---------------------------------------|---------------|--------------|
| CuPd/SiO <sub>2</sub>                 | 37.07         | 62.93        |
| CuPd/SiO <sub>2</sub> 3 <sup>rd</sup> | 39.76         | 60.24        |
| CuPd/SiO <sub>2</sub> 6 <sup>th</sup> | 39.43         | 60.57        |

**Table S4.** Pd content in the Pd/SiO<sub>2</sub> catalyst after each recycling run as determined by ICP-OES.

| Run | Metal Concentration (wt%) |
|-----|---------------------------|
|     | Pd                        |
| 1   | 0.96                      |
| 2   | 0.95                      |
| 3   | 0.93                      |
| 4   | 0.93                      |
| 5   | 0.93                      |

**Table S5.** Cu and Pd contents in the CuPd/SiO<sub>2</sub> catalyst after each recycling run as determined by ICP-OES.

| Run | Metal Concentration (wt%) |      |
|-----|---------------------------|------|
|     | Cu                        | Pd   |
| 1   | 0.97                      | 0.97 |
| 2   | 0.78                      | 0.95 |
| 3   | 0.77                      | 0.94 |
| 4   | 0.77                      | 0.93 |
| 5   | 0.76                      | 0.86 |
| 6   | 0.76                      | 0.75 |
| 7   | 0.74                      | 0.71 |

**Table S6.** Cu and Pd concentrations in solution after removal of the spent catalyst CuPd/SiO<sub>2</sub> by hot filtration after each recycling run as determined by ICP-MS. The CuPd/SiO<sub>2</sub> catalyst was removed by centrifugation (3300 rpm, 10 min) and the supernatant was collected. Catalyst was washed with ethanol (hot, 30 mL) by centrifugation (10 min, 3300 rpm) which was added to the supernatant solution giving a total volume of 50 mL. ICP-MS was run directly on the solution and analyzed for the presence of Pd and Cu.

ICP-MS data shows no leaching of Pd or Cu throughout recyclability trials. Pd and Cu concentrations are below the quantitation limit (BQL).

| <b>Recycling Run</b> | <b>Pd (ppm)</b> | <b>Cu (ppm)</b> |
|----------------------|-----------------|-----------------|
| <i>Blank</i>         | 0.008           | 0.005           |
| 1                    | <0.008 (BQL)    | <0.005 (BQL)    |
| 2                    | <0.008 (BQL)    | <0.005 (BQL)    |
| 3                    | <0.008 (BQL)    | <0.005 (BQL)    |
| 4                    | <0.008 (BQL)    | <0.005 (BQL)    |
| 5                    | <0.008 (BQL)    | <0.005 (BQL)    |
| 6                    | <0.008 (BQL)    | <0.005 (BQL)    |
| 7                    | <0.008 (BQL)    | <0.005 (BQL)    |

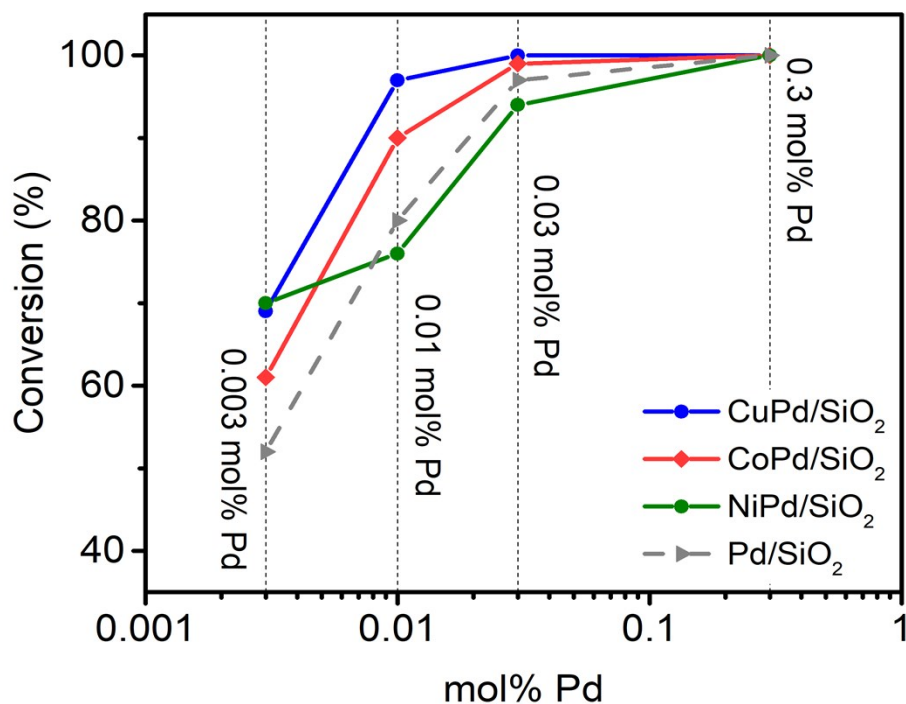

**Figure S6.** Conversion percentage for the bimetallic catalysts using 0.3 mol%, 0.03 mol% and 0.003 mol% Pd concentrations in the MW assisted reaction at 60 °C.

**Table S7.** TON and TOF calculations for catalysts using 0.3 mol%, 0.03 mol% and 0.003 mol% Pd concentrations in the MW assisted reaction at 60 °C.

| mol%<br>Pd | CuPd/SiO <sub>2</sub> |                        | CoPd/SiO <sub>2</sub> |                        | NiPd/SiO <sub>2</sub> |                        | Pd/SiO <sub>2</sub> |                        |
|------------|-----------------------|------------------------|-----------------------|------------------------|-----------------------|------------------------|---------------------|------------------------|
|            | TON                   | TOF (h <sup>-1</sup> ) | TON                   | TOF (h <sup>-1</sup> ) | TON                   | TOF (h <sup>-1</sup> ) | TON                 | TOF (h <sup>-1</sup> ) |
| 0.3        | 333                   | 4,000                  | 333                   | 4,000                  | 333                   | 4,000                  | 333                 | 4,000                  |
| 0.03       | 3,333                 | 40,000                 | 3,266                 | 39,196                 | 3,233                 | 38,800                 | 3,233               | 38,800                 |
| 0.01       | 9,700                 | 116,400                | 9,000                 | 108,000                | 7,600                 | 91,200                 | 8,000               | 96,000                 |
| 0.003      | 23,333                | 280,000                | 19,999                | 239,997                | 20,667                | 248,000                | 17,333              | 208,000                |

**Table S8.**  $^1\text{H}$  NMR analyses of the reaction products.

**D0. 1,1'-biphenyl:**  $^1\text{H}$  NMR (400 MHz,  $\text{CDCl}_3$ )  $\delta$  7.57 – 7.43 (m, 2H), 7.34 (t, 2H), 7.29 – 7.20 (m, 1H).

$^{13}\text{C}$  NMR (101 MHz,  $\text{CDCl}_3$ )  $\delta$  140.19, 127.70, 126.20, 126.11.

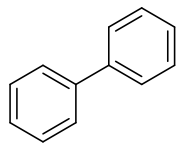

**D1. 4-(benzo[d][1,3]dioxol-5-yl)benzonitrile:**  $^1\text{H}$  NMR (400 MHz, Chloroform-*d*)  $\delta$  7.75 – 7.59 (m, 4H), 7.29 (s, 1H), 7.14 – 7.06 (m, 2H), 6.94 (d, 1H), 6.06 (s, 2H).  $^{13}\text{C}$  NMR (101 MHz,  $\text{CDCl}_3$ )  $\delta$  148.53, 148.27, 145.33, 133.40, 132.60, 127.36, 121.18, 118.99, 110.47, 108.88, 107.52, 101.51.

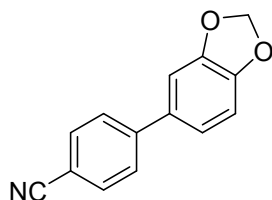

**D2. 4,4'-dimethoxy-1,1'-biphenyl:**  $^1\text{H}$  NMR (400 MHz, Chloroform-*d*)  $\delta$  7.51 (d, 2H), 6.99 (d, 2H), 3.87 (s, 3H).  $^{13}\text{C}$  NMR (101 MHz,  $\text{CDCl}_3$ )  $\delta$  158.71, 133.51, 127.75, 114.18, 55.36.

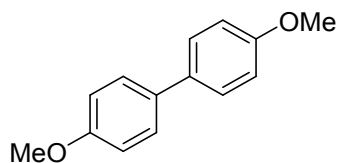

**D3. 5-(4-methoxyphenyl)benzo[d][1,3]dioxole:**  $^1\text{H}$  NMR (400 MHz,  $\text{CDCl}_3$ )  $\delta$  7.47 (d, 2H), 7.05 (d, 2H), 7.02 (s, 1H), 6.98 (d, 2H), 6.89 (d, 1H), 6.01 (s, 2H), 3.87 (s, 3H).  $^{13}\text{C}$  NMR (101 MHz,  $\text{CDCl}_3$ )  $\delta$  158.89, 148.07, 146.59, 135.33, 133.60, 127.91, 120.10, 114.18, 108.54, 107.41, 101.07, 55.37.

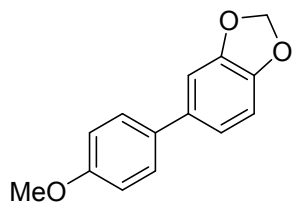

**D4. 4'-(dimethylamino)-[1,1'-biphenyl]-4-carbonitrile:**  $^1\text{H}$  NMR (400 MHz, Chloroform-*d*)  $\delta$  8.12 (s, dH), 7.86 – 7.76 (m, 2H), 7.54 (s, 2H), 7.02 (s, 2H), 3.11 (s, 3H).

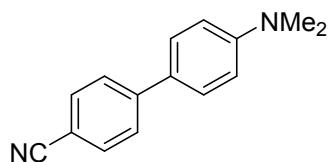

**D5. 4'-(dimethylamino)-[1,1'-biphenyl]-4-carbaldehyde:**  $^1\text{H}$  NMR (400 MHz, Chloroform-*d*)  $\delta$  10.03 (s, 1H), 8.12 (s, 2H), 7.86 – 7.71 (m, 2H), 7.28 (s, 2H), 7.24 – 6.89 (m, 1H), 6.86 – 6.53 (m, 1H), 2.98 – 2.82 (m, 6H).

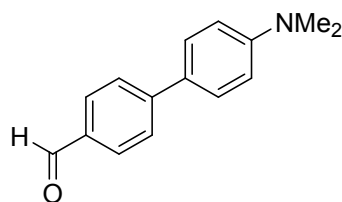

**D6. 4-methoxy-4'-nitro-1,1'-biphenyl:**  $^1\text{H}$  NMR (400 MHz,  $\text{CDCl}_3$ )  $\delta$  8.29 (d, 2H), 7.71 (d, 2H), 7.60 (d, 2H), 7.04 (d, 2H), 3.90 (s, 3H).  $^{13}\text{C}$  NMR (101 MHz,  $\text{CDCl}_3$ )  $\delta$  160.48, 147.22, 131.08, 128.58, 127.08, 124.16, 114.63, 55.44.

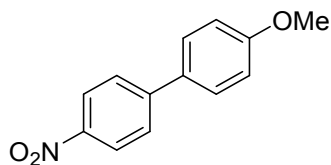

**D7. 4'-nitro-[1,1'-biphenyl]-4-carboxamide:**  $^1\text{H}$  NMR (400 MHz, DMSO)  $\delta$  8.28 (d, 1H), 8.17 – 7.98 (m, 2H), 7.82 (d, 2H), 7.36 (d, 2H), 7.33 – 7.13 (m, 1H).  $^{13}\text{C}$  NMR (101 MHz, DMSO)  $\delta$  167.96, 142.21, 134.07, 130.08, 128.73, 127.96.

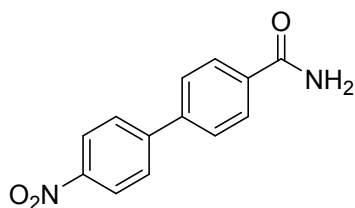

Supplement: d0nr04105j1.pdf [file d0nr04105j1.pdf]
